# Supplementary material
Source: PubMed Central journal article supplement (PMC3400010)

Figure 1 A.

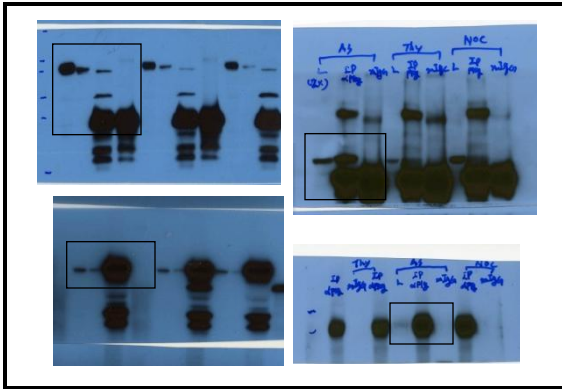

Figure 1 C.

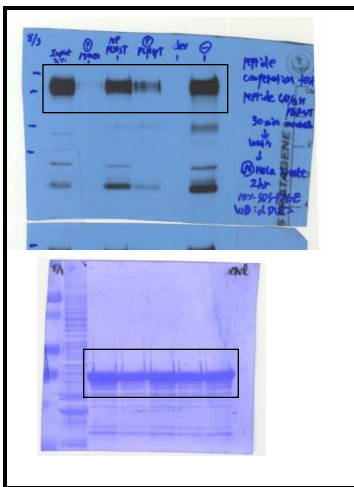

Figure 1 E.

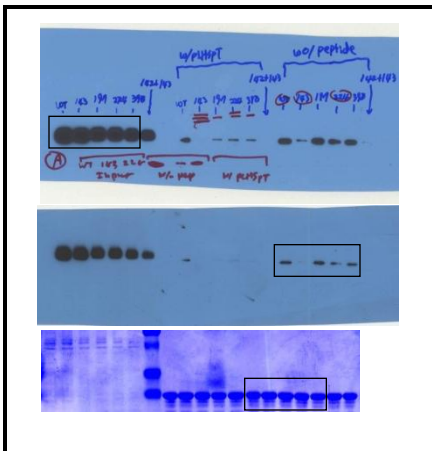

Figure 1 B.

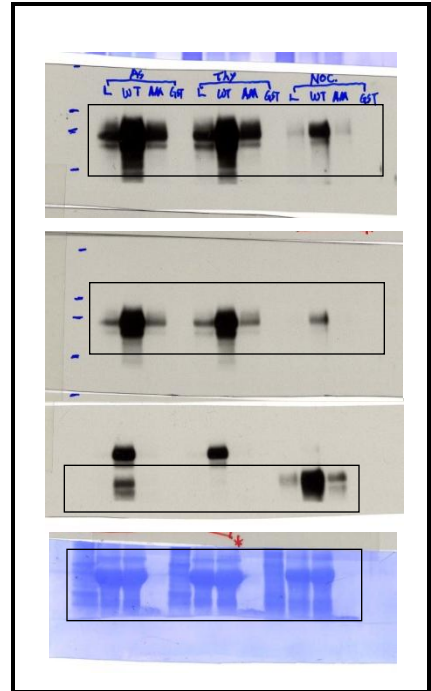

Figure 1 D.

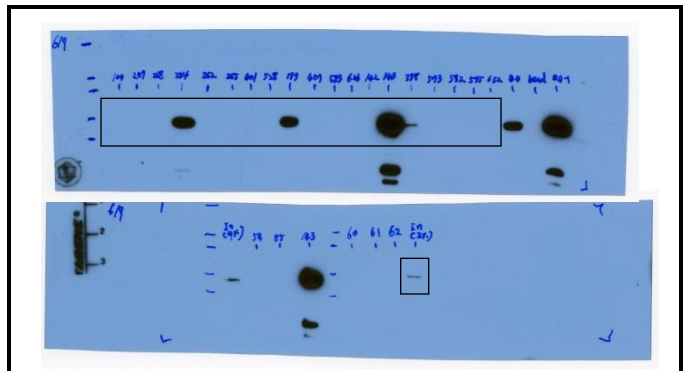

Figure 1 G.

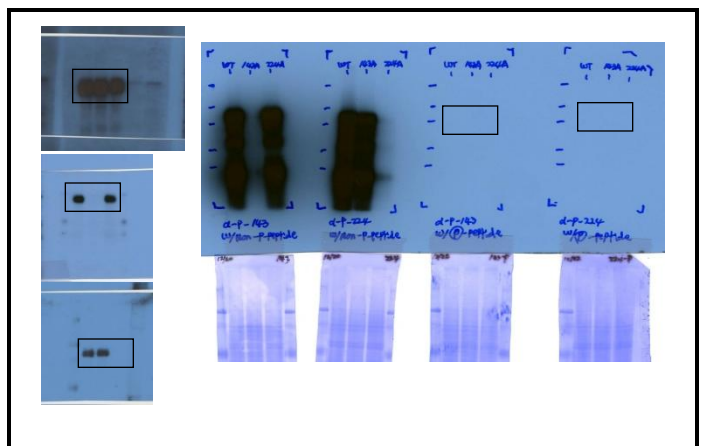

Supplement: emboj2012144s2.pdf [file emboj2012144s2.pdf]

Figure 2 A.

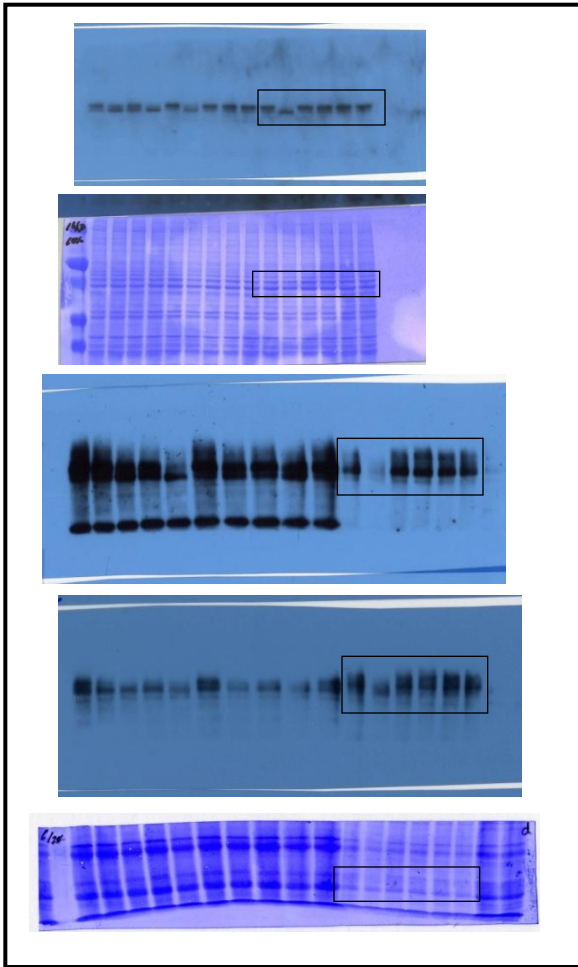

Figure 2 B.

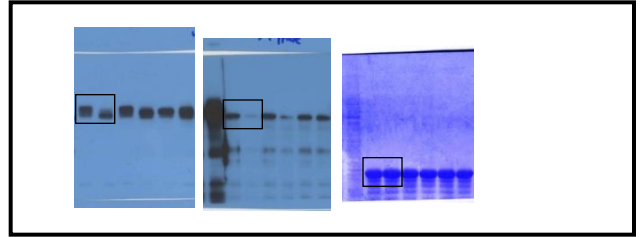

Figure 2 C.

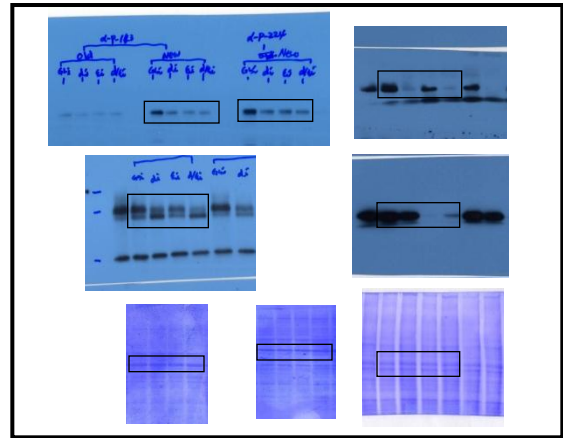

Figure 2 E.

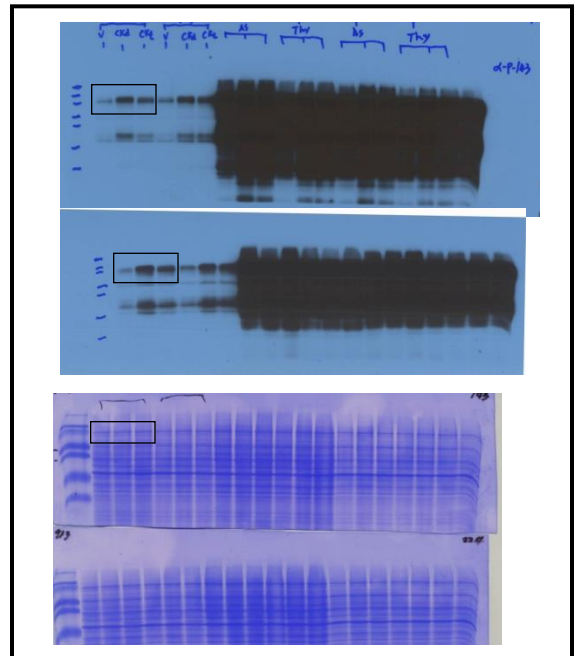

Figure 2 D.

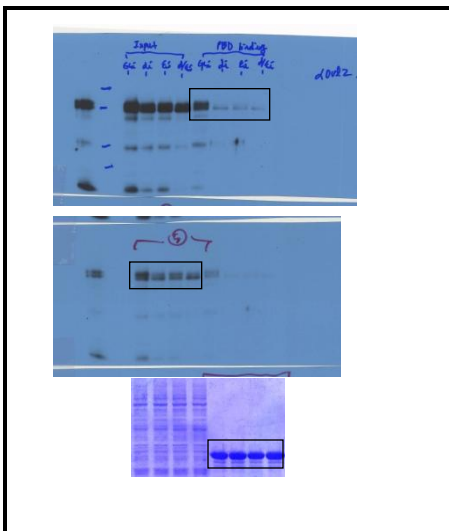

Supplement: emboj2012144s3.pdf [file emboj2012144s3.pdf]

Figure 3 A.

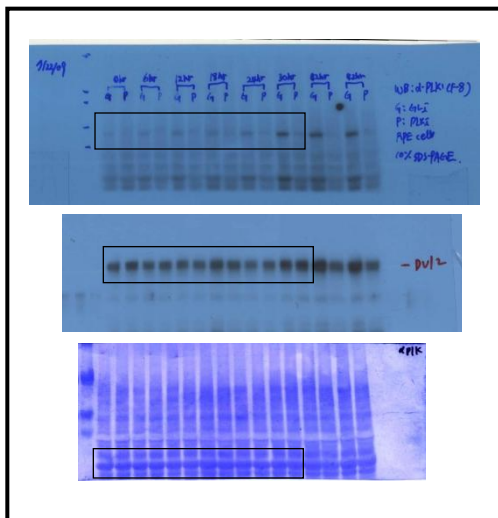

Figure 3 E.

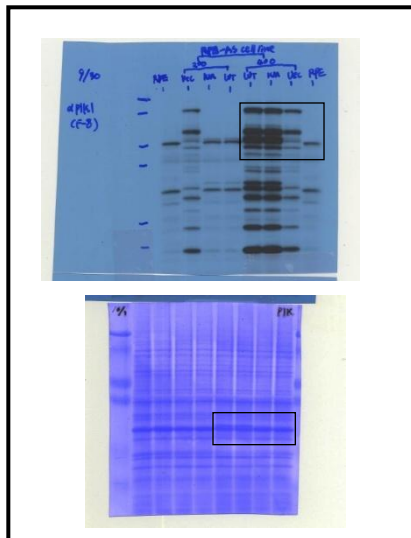

Supplement: emboj2012144s4.pdf [file emboj2012144s4.pdf]

Figure 4 A.

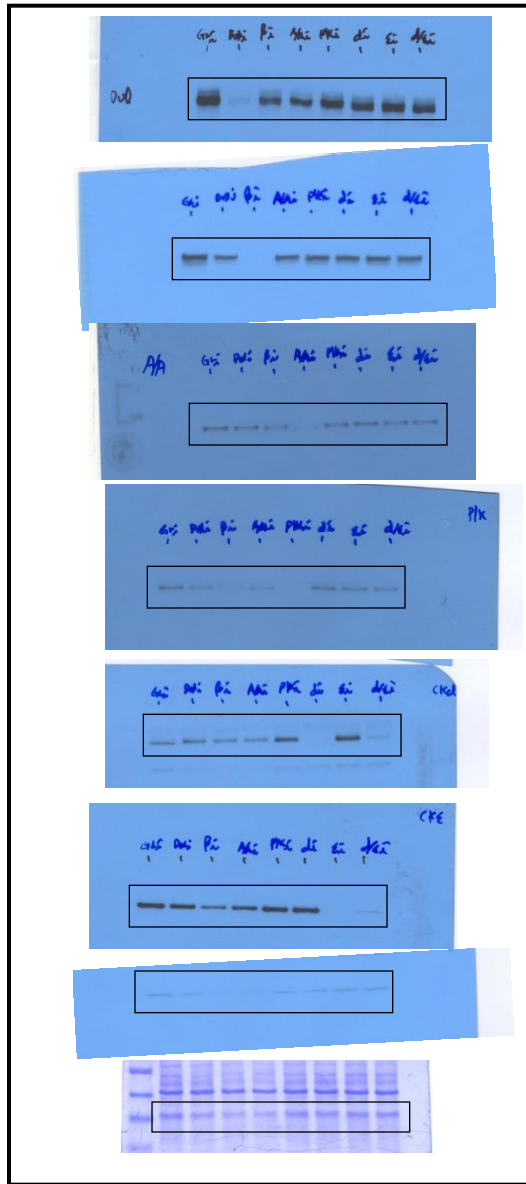

Figure 4 E.

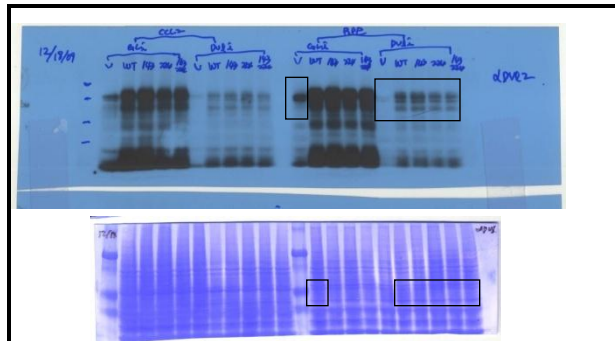

Supplement: emboj2012144s5.pdf [file emboj2012144s5.pdf]

Figure 6 E.

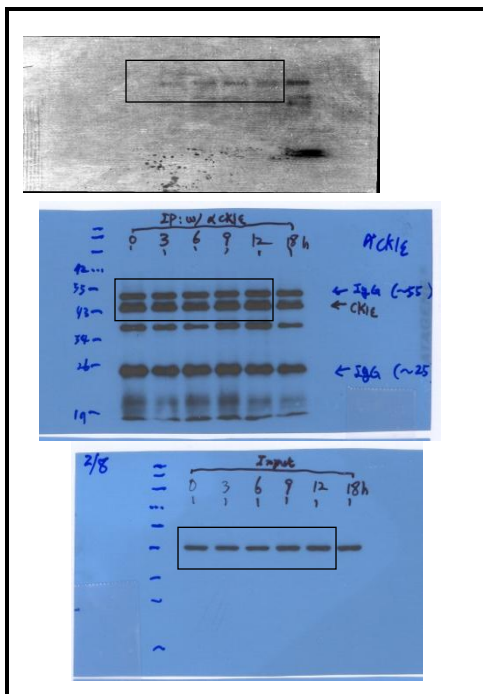

Supplement: emboj2012144s6.pdf [file emboj2012144s6.pdf]

Figure 7 A.

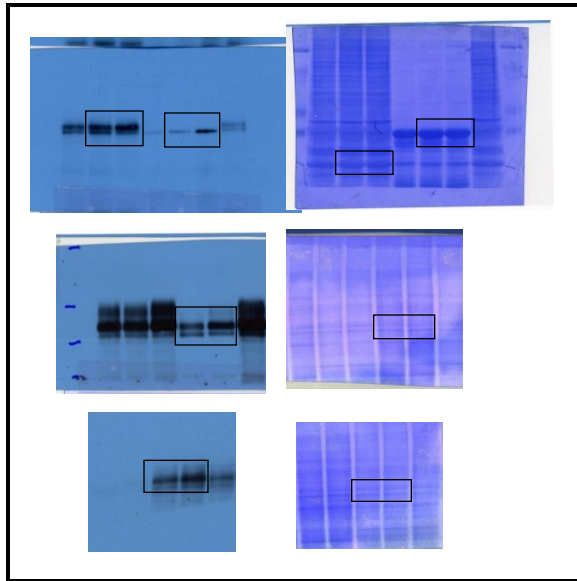

Figure 7 C.

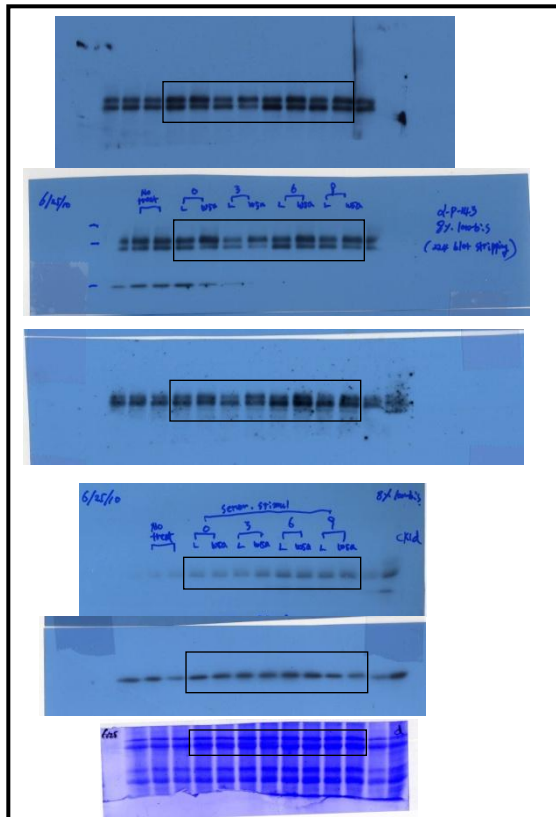

Supplement: emboj2012144s7.pdf [file emboj2012144s7.pdf]

Figure 8 C.

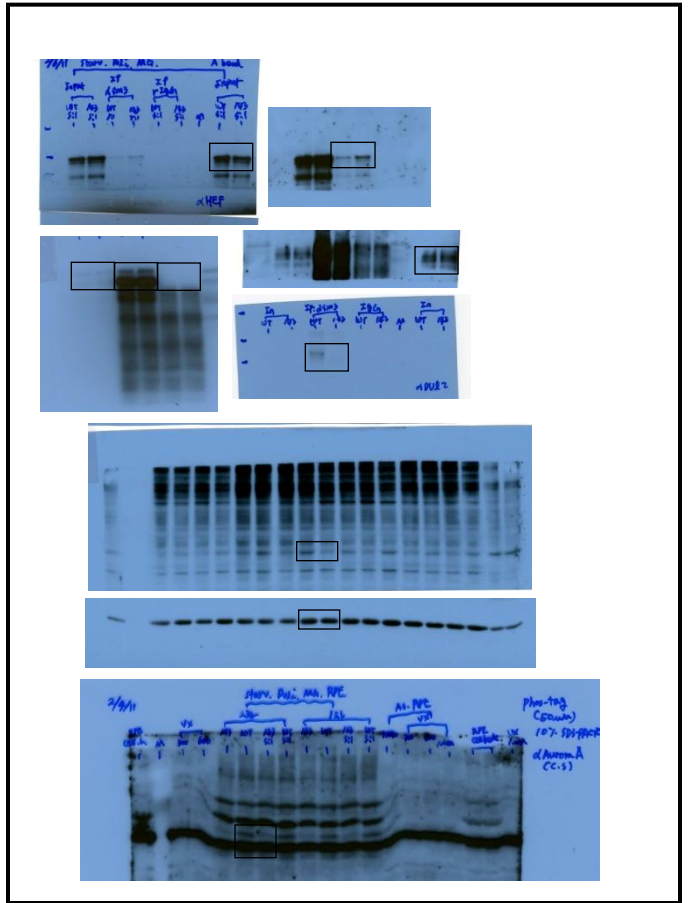

Figure 8 A.

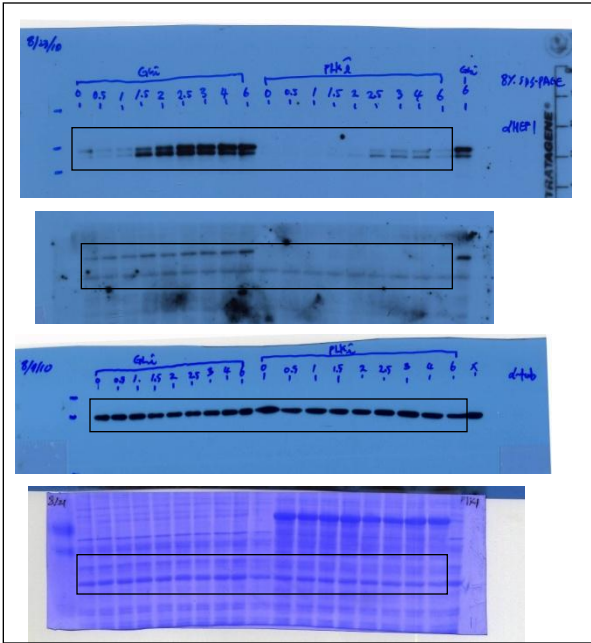

Figure 8 B.

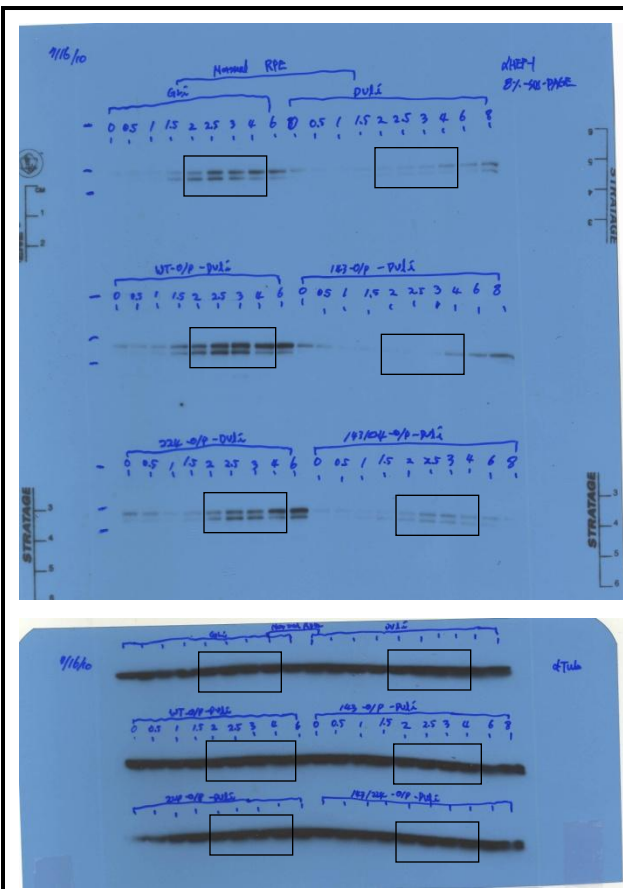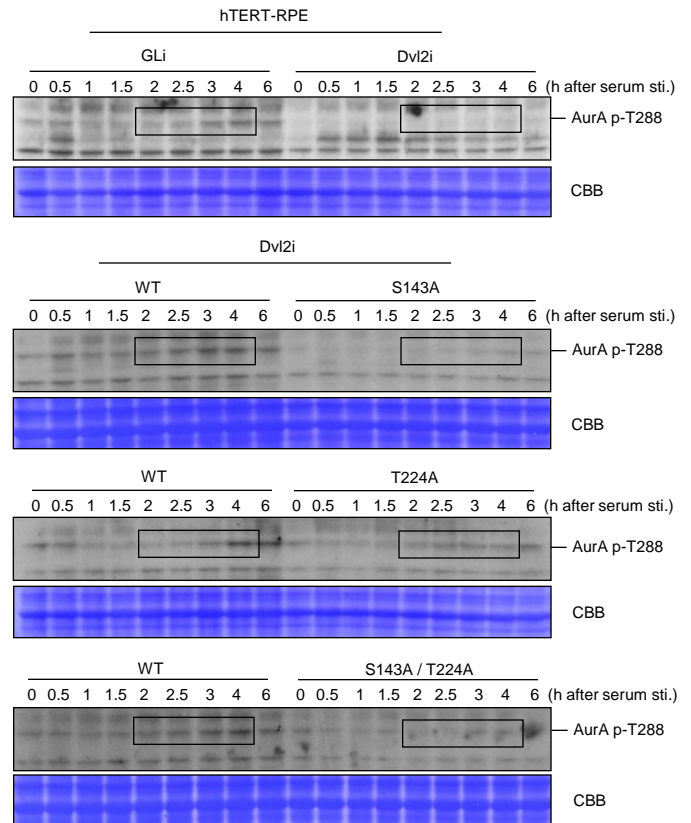

Supplement: emboj2012144s8.pdf [file emboj2012144s8.pdf]
